# Supplementary material for: Effects of Monochromatic Light on Growth and Quality of Pistacia vera L
Source: MDPI journal article supplement (doi:10.3390/plants12071546), 2023-04-03
Supplement: s1 [file s1]

**Table S1.** Result of Chi-Square Tests.

|                                    | Value               | df | Asymptotic<br>Significance<br>(2-sided) | Exact Sig. (2-sided) | Exact Sig. (1-<br>sided) |
|------------------------------------|---------------------|----|-----------------------------------------|----------------------|--------------------------|
| Pearson Chi-Square                 | 36,400 <sup>a</sup> | 1  | ,000                                    |                      |                          |
| Continuity Correction <sup>b</sup> | 34,098              | 1  | ,000                                    |                      |                          |
| Likelihood Ratio                   | 47,970              | 1  | ,000                                    |                      |                          |
| Fisher's Exact Test                |                     |    |                                         | ,000                 | ,000                     |
| Linear-by-Linear Association       | 36,264              | 1  | ,000                                    |                      |                          |
| N of Valid Cases                   | 268                 |    |                                         |                      |                          |

**Table S2.** Soot tip necrosis \* leaf necrosis Crosstabulation.

|       |                                                 |                | Leaf necrosis               |                              | Total  |
|-------|-------------------------------------------------|----------------|-----------------------------|------------------------------|--------|
|       |                                                 |                | absence of<br>leaf necrosis | presence of<br>leaf necrosis |        |
| stn   | No Shoot tip necrosis<br>symptoms               | Count          | 30                          | 99                           | 129    |
|       |                                                 | Expected Count | 14,4                        | 114,6                        | 129,0  |
|       |                                                 | % within stn   | 23,3%                       | 76,7%                        | 100,0% |
|       | Presence of shoot tip<br>necrosis test symptoms | Count          | 0                           | 139                          | 139    |
|       |                                                 | Expected Count | 15,6                        | 123,4                        | 139,0  |
|       |                                                 | % within stn   | 0,0%                        | 100,0%                       | 100,0% |
| Total | Count                                           | 30             | 238                         | 268                          |        |
|       | Expected Count                                  | 30,0           | 238,0                       | 268,0                        |        |
|       | % within stn                                    | 11,2%          | 88,8%                       | 100,0%                       |        |
